# Supplementary material for: Prevalence and Characteristics of Polyneuropathy in Atypical Parkinsonian Syndromes: An Explorative Study
Source: MDPI journal article supplement (doi:10.3390/brainsci11070879), 2021-06-30
Supplement: s1 [file s1]

**Table S1.** Analysis of motor scores and PDQ-39 in MSA and PSP patients divided into subgroups of NSS 0-5 / 6-10.

|                                                     | MSA         |             |              | PSP         |             |         |
|-----------------------------------------------------|-------------|-------------|--------------|-------------|-------------|---------|
|                                                     | NSS 0-5     | NSS 6-10    | p value      | NSS 0-5     | NSS 6-10    | p value |
|                                                     | (n = 3)     | (n = 5)     |              | (n = 4)     | (n = 2)     |         |
|                                                     | M ± SD      | M ± SD      |              | M ± SD      | M ± SD      |         |
| UMSARS II                                           | 13.3 ± 7.6  | 28.8 ± 11.9 | 0.143        | n.a.        | n.a.        | n.a.    |
| PSPRS V+VI <sup>*1</sup>                            | n.a.        | n.a.        | n.a.         | 10 ± 0      | 18 ± 1.4    | 0.333   |
| MDS-UPDRS III <sup>*2</sup>                         | 23.7 ± 17.7 | 57.8 ± 31.4 | 0.143        | 28 ± 6.2    | 46 ± 8.5    | 0.200   |
| Factor 1 Midline function <sup>*2</sup>             | 6 ± 7.8     | 19 ± 7.1    | 0.071        | 9 ± 2.6     | 18.5 ± 2.1  | 0.200   |
| Factor 2 Rest tremor <sup>*2</sup>                  | 0 ± 0       | 1.4 ± 3.1   | 0.786        | 0 ± 0       | 0 ± 0       | 1.000   |
| Factor 3 Rigidity <sup>*2</sup>                     | 6.7 ± 4.2   | 10 ± 7.4    | 0.786        | 5 ± 1       | 5 ± 1.4     | 1.000   |
| Factor 4 Bradykinesia right UEX <sup>*2</sup>       | 4.7 ± 2.1   | 6.6 ± 3.6   | 0.571        | 4.3 ± 1.2   | 8 ± 1.4     | 0.200   |
| Factor 5 Bradykinesia left UEX <sup>*2</sup>        | 2.3 ± 2.1   | 7.6 ± 4     | 0.143        | 3.7 ± 1.2   | 7.5 ± 2.1   | 0.200   |
| Factor 6 Postural and kinetic tremors <sup>*2</sup> | 1 ± 1.7     | 4 ± 4.7     | 0.250        | 1.3 ± 1.5   | 0 ± 0       | 0.400   |
| Factor 7 Lower limb bradykinesia <sup>*2</sup>      | 3 ± 3.6     | 9.2 ± 4.3   | 0.143        | 4.7 ± 1.2   | 7 ± 1.4     | 0.200   |
| PDQ-39 SI                                           | 5.1 ± 2.1   | 9.9 ± 2.2   | <b>0.036</b> | 6.6 ± 3.8   | 9.8 ± 2.2   | 0.533   |
| PDQ-39 1 Mobility                                   | 21.7 ± 27   | 80 ± 16     | <b>0.036</b> | 48.1 ± 31   | 62.5 ± 14.1 | 0.800   |
| PDQ-39 2 Activities of daily living                 | 26.4 ± 19.7 | 61.7 ± 26.4 | 0.143        | 38.5 ± 20.5 | 56.3 ± 14.7 | 0.533   |
| PDQ-39 3 Emotional well-being                       | 27.8 ± 17.3 | 48.3 ± 9.6  | 0.071        | 24 ± 28.7   | 41.7 ± 35.4 | 0.533   |
| PDQ-39 4 Stigma                                     | 31.3 ± 31.3 | 38.8 ± 30.1 | 0.786        | 28.1 ± 30   | 46.9 ± 66.3 | 0.800   |
| PDQ-39 5 Social support                             | 19.4 ± 33.7 | 18.3 ± 22.4 | 1.000        | 14.6 ± 18.5 | 4.2 ± 5.9   | 0.533   |
| PDQ-39 6 Cognitions                                 | 33.3 ± 21.9 | 27.5 ± 12.2 | 0.786        | 35.9 ± 28.1 | 31.3 ± 35.4 | 0.800   |
| PDQ-39 7 Communication                              | 25 ± 14.4   | 36.7 ± 25.4 | 0.393        | 41.7 ± 11.8 | 75 ± 23.6   | 0.133   |
| PDQ-39 8 Bodily discomfort                          | 38.9 ± 31.5 | 36.7 ± 24   | 0.786        | 18.8 ± 18.5 | 70.8 ± 5.9  | 0.133   |

<sup>\*1</sup>n for PSP = 4, NSS 0-5 n = 2, NSS 6-10 n = 2; <sup>\*2</sup>n for PSP = 5, NSS 0-5 n = 3, NSS 6-10 n = 2

**Table S2.** Bivariate correlation analyses between nerve conduction studies, NSS and motor scores in MSA and PSP patients.

|                                                     | MSA                   |              |                        |              |                |       | PSP                   |              |                        |              |                |              |
|-----------------------------------------------------|-----------------------|--------------|------------------------|--------------|----------------|-------|-----------------------|--------------|------------------------|--------------|----------------|--------------|
|                                                     | sNAP sural nerve (µV) |              | cMAP tibial nerve (mV) |              | NSS            |       | sNAP sural nerve (µV) |              | cMAP tibial nerve (mV) |              | NSS            |              |
|                                                     | (n = 7)               |              | (n = 8)                |              | (n = 8)        |       | (n = 6)               |              | (n = 6)                |              | (n = 6)        |              |
|                                                     | r <sub>s</sub>        | p            | r <sub>s</sub>         | p            | r <sub>s</sub> | p     | r <sub>s</sub>        | p            | r <sub>s</sub>         | p            | r <sub>s</sub> | p            |
| NSS                                                 | -0.738                | 0.058        | -0.561                 | 0.148        | n.a.           | n.a.  | -0.353                | 0.493        | -0.232                 | 0.658        | n.a.           | n.a.         |
| UMSARS II                                           | -0.299                | 0.514        | -0.762                 | <b>0.028</b> | 0.464          | 0.247 | n.a.                  | n.a.         | n.a.                   | n.a.         | n.a.           | n.a.         |
| PSPRS V+VI <sup>*1</sup>                            | n.a.                  | n.a.         | n.a.                   | n.a.         | n.a.           | n.a.  | -0.056                | 0.944        | -0.738                 | 0.262        | 0.949          | 0.051        |
| MDS-UPDRS III <sup>*2</sup>                         | -0.299                | 0.514        | -0.738                 | <b>0.037</b> | 0.512          | 0.194 | -0.667                | 0.219        | -0.5                   | <b>0.391</b> | 0.975          | <b>0.005</b> |
| Factor 1 Midline function <sup>*2</sup>             | -0.274                | 0.552        | -0.79                  | <b>0.020</b> | 0.565          | 0.145 | -0.667                | 0.219        | -0.5                   | <b>0.391</b> | 0.975          | <b>0.005</b> |
| Factor 2 Rest tremor <sup>*2</sup>                  | 0.321                 | 0.483        | -0.412                 | 0.310        | -0.085         | 0.842 | 0.000                 | 0.000        | 0.000                  | 0.000        | 0.000          | 0.000        |
| Factor 3 Rigidity <sup>*2</sup>                     | -0.359                | 0.429        | -0.192                 | 0.649        | 0.221          | 0.599 | 0.081                 | 0.897        | -0.158                 | 0.800        | 0.162          | 0.794        |
| Factor 4 Bradykinesia right UEX <sup>*2</sup>       | -0.048                | 0.919        | -0.615                 | 0.105        | 0.161          | 0.704 | -0.553                | 0.334        | -0.616                 | 0.269        | 0.921          | <b>0.026</b> |
| Factor 5 Bradykinesia left UEX <sup>*2</sup>        | -0.449                | 0.312        | -0.452                 | 0.260        | 0.390          | 0.339 | -0.237                | 0.701        | -0.667                 | 0.219        | 0.763          | 0.133        |
| Factor 6 Postural and kinetic tremors <sup>*2</sup> | -0.171                | 0.713        | -0.724                 | <b>0.042</b> | 0.352          | 0.392 | -0.057                | 0.927        | 0.783                  | <b>0.118</b> | -0.344         | 0.571        |
| Factor 7 Lower limb bradykinesia <sup>*2</sup>      | -0.500                | 0.253        | -0.683                 | 0.062        | 0.515          | 0.191 | -0.649                | 0.236        | -0.211                 | 0.734        | 0.973          | <b>0.005</b> |
| PDQ-39 Score                                        | -0.318                | 0.487        | -0.643                 | 0.086        | 0.561          | 0.148 | -0.435                | 0.389        | 0.086                  | 0.872        | 0.464          | 0.354        |
| PDQ-39 1 Mobility                                   | -0.318                | 0.487        | -0.667                 | 0.071        | 0.512          | 0.194 | -0.319                | 0.538        | -0.029                 | 0.957        | 0.087          | 0.870        |
| PDQ-39 2 Activities of daily living                 | 0.187                 | 0.688        | -0.595                 | 0.120        | 0.171          | 0.686 | -0.559                | 0.249        | -0.319                 | 0.538        | 0.132          | 0.803        |
| PDQ-39 3 Emotional well-being                       | -0.019                | 0.968        | -0.826                 | <b>0.011</b> | 0.565          | 0.145 | -0.551                | 0.257        | -0.143                 | <b>0.787</b> | 0.319          | 0.538        |
| PDQ-39 4 Stigma                                     | -0.255                | 0.581        | -0.168                 | 0.691        | 0.061          | 0.885 | -0.103                | 0.846        | 0.406                  | 0.425        | 0.309          | 0.551        |
| PDQ-39 5 Social support                             | -0.155                | 0.739        | -0.254                 | 0.544        | 0.000          | 1.000 | -0.329                | 0.525        | 0.062                  | 0.908        | -0.376         | 0.463        |
| PDQ-39 6 Cognitions                                 | -0.892                | <b>0.007</b> | 0.356                  | 0.387        | 0.340          | 0.410 | 0.235                 | <b>0.654</b> | 0.493                  | 0.321        | -0.221         | 0.674        |
| PDQ-39 7 Communication                              | -0.397                | 0.379        | 0.048                  | 0.910        | 0.173          | 0.682 | 0.000                 | 1.000        | -0.265                 | 0.612        | 0.851          | <b>0.032</b> |
| PDQ-39 8 Bodily discomfort                          | 0.255                 | 0.581        | 0.371                  | 0.365        | -0.270         | 0.518 | -0.261                | 0.618        | -0.257                 | 0.623        | 0.696          | 0.125        |

<sup>\*1</sup>n for PSP = 4; <sup>\*2</sup>n for PSP = 5

**Table S3.** Partial correlation analyses between nerve conduction studies and motor scores in MSA patients after controlling for confounding variable age.

|                                       | MSA                                    |       |                                   |              |
|---------------------------------------|----------------------------------------|-------|-----------------------------------|--------------|
|                                       | sNAP sural nerve ( $\mu$ V)<br>(n = 7) |       | cMAP tibial nerve (mV)<br>(n = 8) |              |
|                                       | $r_s$                                  | p     | $r_s$                             | p            |
| NSS                                   | -0.593                                 | 0.215 | -0.163                            | 0.727        |
| UMSARS II                             | -0.061                                 | 0.908 | <b>-0.873</b>                     | <b>0.010</b> |
| MDS-UPDRS III                         | -0.036                                 | 0.946 | <b>-0.816</b>                     | <b>0.025</b> |
| Factor 1 Midline function             | -0.060                                 | 0.910 | <b>-0.891</b>                     | <b>0.007</b> |
| Factor 2 Rest tremor                  | 0.365                                  | 0.476 | -0.698                            | 0.081        |
| Factor 3 Rigidity                     | -0.053                                 | 0.921 | -0.384                            | 0.395        |
| Factor 4 Bradykinesia right UEX       | 0.054                                  | 0.919 | <b>-0.771</b>                     | <b>0.043</b> |
| Factor 5 Bradykinesia left UEX        | -0.281                                 | 0.590 | <b>-0.828</b>                     | <b>0.021</b> |
| Factor 6 Postural and kinetic tremors | 0.203                                  | 0.699 | <b>-0.800</b>                     | <b>0.031</b> |
| Factor 7 Lower limb bradykinesia      | -0.345                                 | 0.503 | <b>-0.846</b>                     | <b>0.016</b> |

**Table S4.** Laboratory parameters subdivided into subgroups with/without electrophysiologically confirmed polyneuropathy.

| Parameter                        | Unit         | Total MSA patients<br>(n=8) | MSA patients without PNP<br>(n=4) | MSA patients with PNP<br>(n=4) | Total PSP patients<br>(n=6) | PSP patients without PNP<br>(n=3) | PSP patients with PNP<br>(n=3) |
|----------------------------------|--------------|-----------------------------|-----------------------------------|--------------------------------|-----------------------------|-----------------------------------|--------------------------------|
|                                  |              | M $\pm$ SD                  | M $\pm$ SD                        | M $\pm$ SD                     | M $\pm$ SD                  | M $\pm$ SD                        | M $\pm$ SD                     |
| Leukocytes                       | / $\mu$ l    | 7326.3 $\pm$ 1499.8         | 6920 $\pm$ 1317.4                 | 7732.5 $\pm$ 1753              | 6635 $\pm$ 1179.4           | 6350 $\pm$ 1499.6                 | 6920 $\pm$ 992.4               |
| Erythrocytes                     | Mio/ $\mu$ l | 4.8 $\pm$ 0.3               | 4.9 $\pm$ 0.2                     | 4.6 $\pm$ 0.3                  | 4.7 $\pm$ 0.5               | 4.4 $\pm$ 0.3                     | 4.9 $\pm$ 0.5                  |
| HbA1c                            | %            | 5.5 $\pm$ 0.3               | 5.5 $\pm$ 0.3                     | 5.6 $\pm$ 0.2                  | 5.7 $\pm$ 0.3               | 5.8 $\pm$ 0.2                     | 5.5 $\pm$ 0.5                  |
| GOT                              | $\mu$ /L     | 20.6 $\pm$ 3.6              | 18.8 $\pm$ 2.1                    | 22.5 $\pm$ 4                   | 22.3 $\pm$ 3.8              | 22.7 $\pm$ 3.8                    | 22 $\pm$ 4.6                   |
| GPT                              | $\mu$ /L     | 16.5 $\pm$ 7.3              | 20.3 $\pm$ 5.7                    | 12.8 $\pm$ 7.3                 | 18.5 $\pm$ 7.1              | 15 $\pm$ 3                        | 22 $\pm$ 9                     |
| GGT                              | $\mu$ /L     | 21.3 $\pm$ 6.1              | 24.5 $\pm$ 4.9                    | 18 $\pm$ 5.8                   | 44.8 $\pm$ 44               | 27.3 $\pm$ 4.2                    | 62.3 $\pm$ 62.5                |
| Urea                             | mg/dl        | 34.1 $\pm$ 11.8             | 32 $\pm$ 8.1                      | 36.3 $\pm$ 15.6                | 33.8 $\pm$ 14.6             | 26.3 $\pm$ 10.8                   | 41.3 $\pm$ 15.6                |
| Creatinine                       | mg/dl        | 0.8 $\pm$ 0.1               | 0.9 $\pm$ 0.1                     | 0.7 $\pm$ 0                    | 1 $\pm$ 0.4                 | 0.9 $\pm$ 0.2                     | 1.2 $\pm$ 0.5                  |
| Sodium                           | mmol/l       | 140.3 $\pm$ 7.2             | 143.3 $\pm$ 2.1                   | 137.3 $\pm$ 9.7                | 141.2 $\pm$ 1.2             | 141.7 $\pm$ 0.6                   | 140.7 $\pm$ 1.5                |
| Potassium                        | mmol/l       | 4.1 $\pm$ 0.5               | 4.4 $\pm$ 0.1                     | 3.7 $\pm$ 0.6                  | 4.2 $\pm$ 0.4               | 4.4 $\pm$ 0.1                     | 4 $\pm$ 0.5                    |
| TSH                              | $\mu$ IE/ml  | 1.6 $\pm$ 1.2               | 1.6 $\pm$ 1.7                     | 1.6 $\pm$ 0.7                  | 1.2 $\pm$ 0.4               | 1.2 $\pm$ 0.6                     | 1.2 $\pm$ 0.3                  |
| Vitamin B12                      | pg/ml        | 592.4 $\pm$ 368.5           | 418.3 $\pm$ 125.5                 | 766.5 $\pm$ 469.3              | 378.5 $\pm$ 81.5            | 327.7 $\pm$ 27.4                  | 429.3 $\pm$ 90.1               |
| Folic acid                       | ng/ml        | 8.3 $\pm$ 3.4               | 6.3 $\pm$ 2.4                     | 10.3 $\pm$ 3.1                 | 8.1 $\pm$ 5.9               | 6.1 $\pm$ 0.5                     | 10.2 $\pm$ 8.6                 |
| Vitamin B1                       | $\mu$ g/l    | 53.6 $\pm$ 12.9             | 52.8 $\pm$ 16.8                   | 54.4 $\pm$ 10.1                | 60.1 $\pm$ 28               | 47.5 $\pm$ 14.8                   | 72.6 $\pm$ 35.7                |
| Vitamin B6                       | $\mu$ g/l    | 12.2 $\pm$ 7.7              | 10.5 $\pm$ 5.6                    | 13.9 $\pm$ 10                  | 13 $\pm$ 5                  | 13.3 $\pm$ 5.1                    | 12.6 $\pm$ 5.9                 |
| Methylmalonic acid <sup>*1</sup> | nmol/l       | 303.9 $\pm$ 110.1           | 333.9 $\pm$ 152.2                 | 274 $\pm$ 66.7                 | 298 $\pm$ 98.2              | 346 $\pm$ 123.9                   | 250.1 $\pm$ 43.1               |
| Homocysteine <sup>*2</sup>       | $\mu$ mol/l  | 19.3 $\pm$ 3.7              | 20.9 $\pm$ 3.2                    | 16 $\pm$ 2.1                   | 20.3 $\pm$ 7.2              | 19.8 $\pm$ 5.5                    | 20.8 $\pm$ 9.9                 |
| Holotranscobalamine              | pmol/l       | 120.8 $\pm$ 48              | 126 $\pm$ 29.7                    | 115.6 $\pm$ 66.5               | 75.5 $\pm$ 32.8             | 51.8 $\pm$ 6.2                    | 99.2 $\pm$ 31                  |

<sup>\*1</sup> n for MSA = 6, without PNP = 3, with PNP = 3; <sup>\*2</sup> n for MSA = 6, without PNP = 4, with PNP = 2
